# Supplementary material for: The Daisho Peptides Mediate Drosophila Defense Against a Subset of Filamentous Fungi
Source: Front Immunol. 2020 Jan 23;11:9. doi: 10.3389/fimmu.2020.00009 (PMC6989431; doi:10.3389/fimmu.2020.00009)
Supplement: Supplementary file 1 [file Table_1.XLSX]

## Sheet: Sheet1
Table S1: Primers used generating constructs for CRISPR/Cas9 mutants Δdaisho, Δdso1, Δdso2 and FLAG-Dso2.
	Left sense oligo	Left antisense oligo	Right sense oligo	Right antisense oligo	homology arm 1 forward primer	homology arm 1 reverse primer	homology arm 2 forward primer	homology arm 2 reverse primer
Δdaisho	CTTCGGATGTCAATCAAACTCAAC	AAACGTTGAGTTTGATTGACATCC	CTTCGATTGCGGCTTTGGCGACGG	AAACCCGTCGCCAAAGCCGCAATC	GCAGCCTGAAACTGAACGAT	GAGTTTGATTGACATCGAATCT	CGGCGGAGGCTGGTGAGTGCAT	TCGCCAGGCTCTGATAAAAT
Δdso1	CTTCGATTACTACTAAGTATTGCA	AAACTGCAATACTTAGTAGTAATC	CTTCGGGCGATTCCAAGACAACCT	AAACAGGTTGTCTTGGAATCGCCC	TAGTTGGCTACTTCAAAAGC	AATACTTAGTAGTAATCAAAAG	CCTGGGT GATTACACAGG TT	TGGCGGCTTTAAAAGTAGG
Δdso2	CTTCGATGCAGTGAGCTCGCCAGC	AAACGCTGGCGAGCTCACTGCATC	CTTCGAGCGCGCACATAGTGGGAA	AAACTTCCCACTATGTGCGCGCTC	CTGGGCGATTCCAAGACAAC	AGCTGGCGGCTTTAAAAGTAGG	GAAAGTGTCACACTGACTAAATATAC	GTTGTCGTTGTCAAAATG
	sequence cloned into pHD-DsRed
FLAG-Dso2	GGAACATCCGCGGGGCGAGCTCACTGCATCGGATGGGTGAGCTATATAAGCGCGCCCTGTCCGGATCGCTAATCAAAGTAGAATTTGAATTCAAACTGTAAACATGAACTGTCTGAAGATCTGCGGCTTTTTCTTCGCTCTGATTGCGGCTTTGGCGACGGCGGAGGCTGACTACAAAGACGATGACGACAAGGGTGAGTGCATAAAAAAGCAATCTTAAAGATCGTTTTTTGCTTATCAGCATTTTATTATTGATAGGCACCCAAGTCATTCATGCTGGCGGACACACGTTGATTCAAACTGATCGCTCGCAGTATATACGCAAAAACTAAAAAAAAAACCTCAAATAAATATTTAAAGAATAAAAATGTTTTGAAACAGCATATGATGTTCC
